# Supplementary material
Source: publisher site journal article supplement (https://www.dovepress.com/article/252027)

**Supplementary Figure 1**

The schematic diagram showing the workflow in the paper.


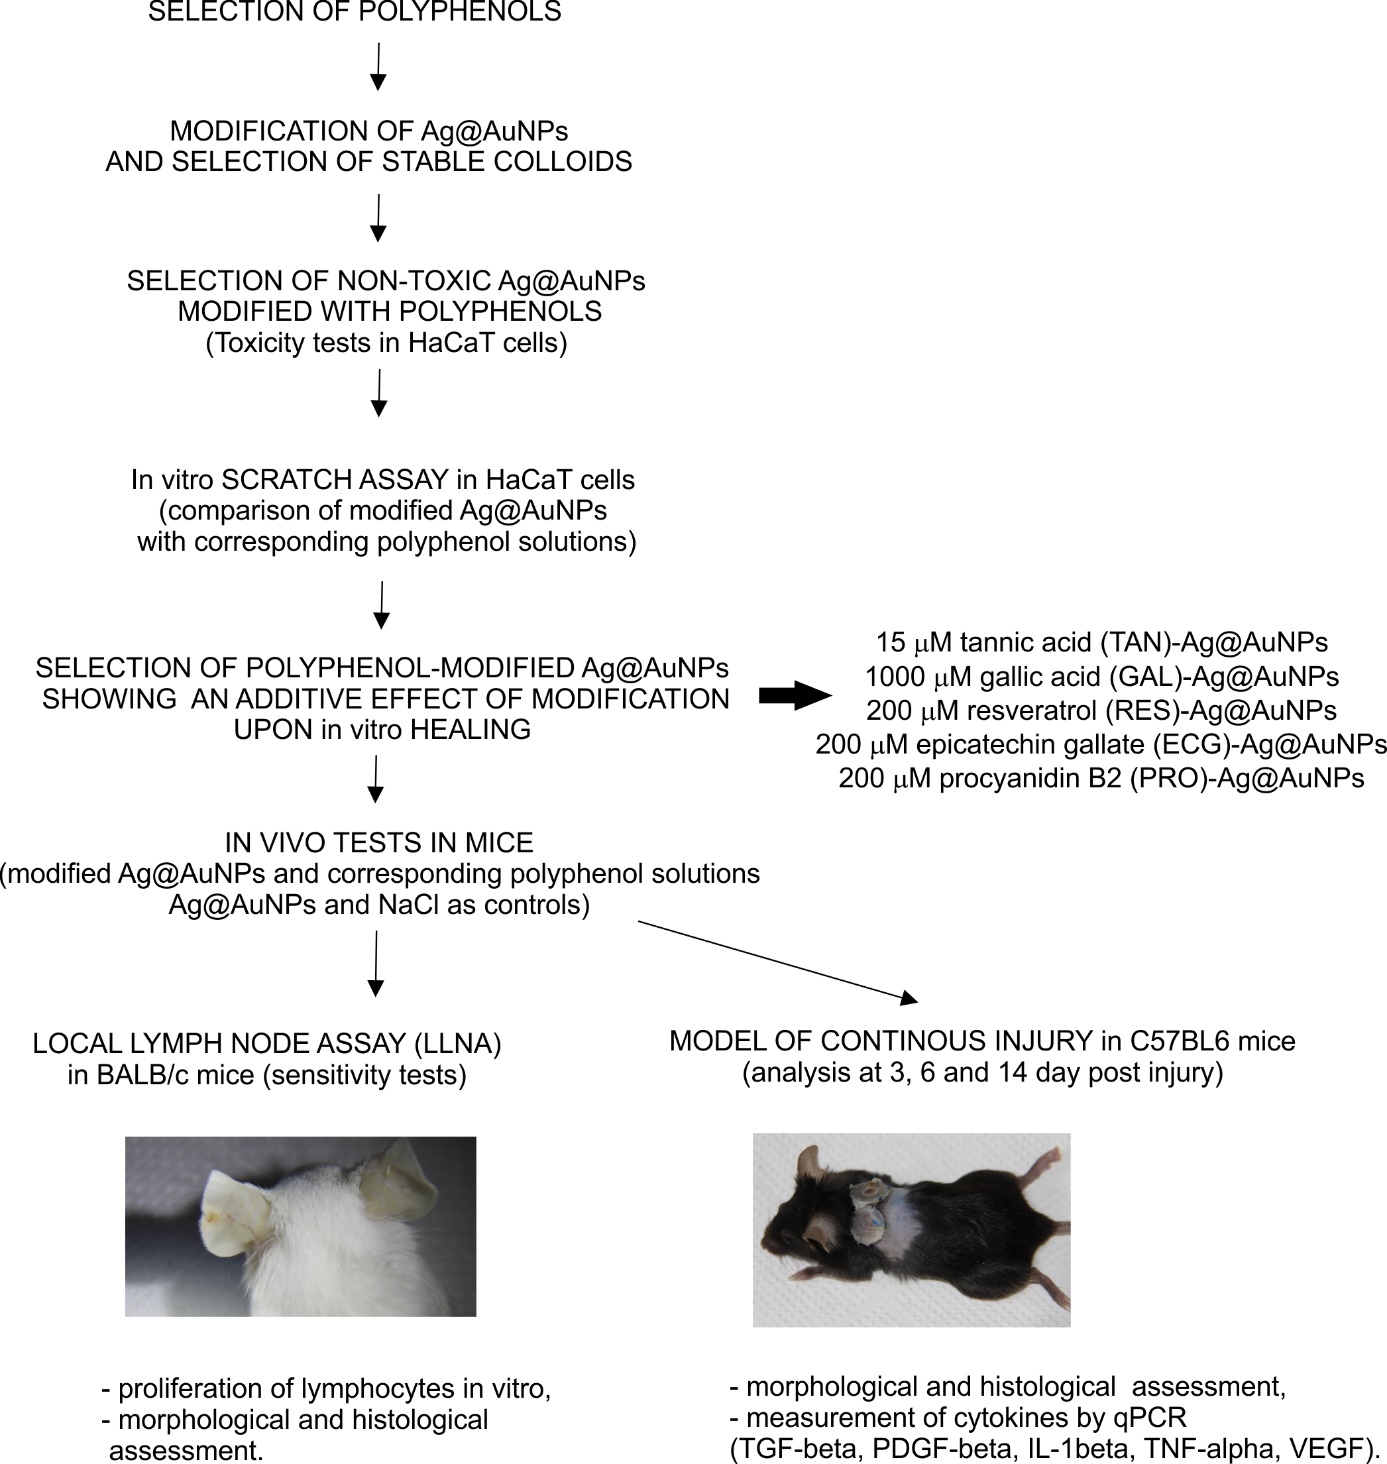


**Supplementary Figure 2**

General morphology of wounds after treatment with unmodified and polyphenol-modified Au@AgNPs. Representative microphotographs of hematoxylin-eosin stained wound sections at 6 and 14 day post injury. Modified and unmodified Au@AgNPs as well as solutions of polyphenols used for modification were applied at 5 µg/ml in saline. Magnification x 400.

Abbreviations: NPs – Au@AgNPs, ECG – epicatechin gallate modified, GAL- gallic acid modified, PRO – procyanidin B2 modified, RES – resveratrol modified, TAN – tannic acid modified.


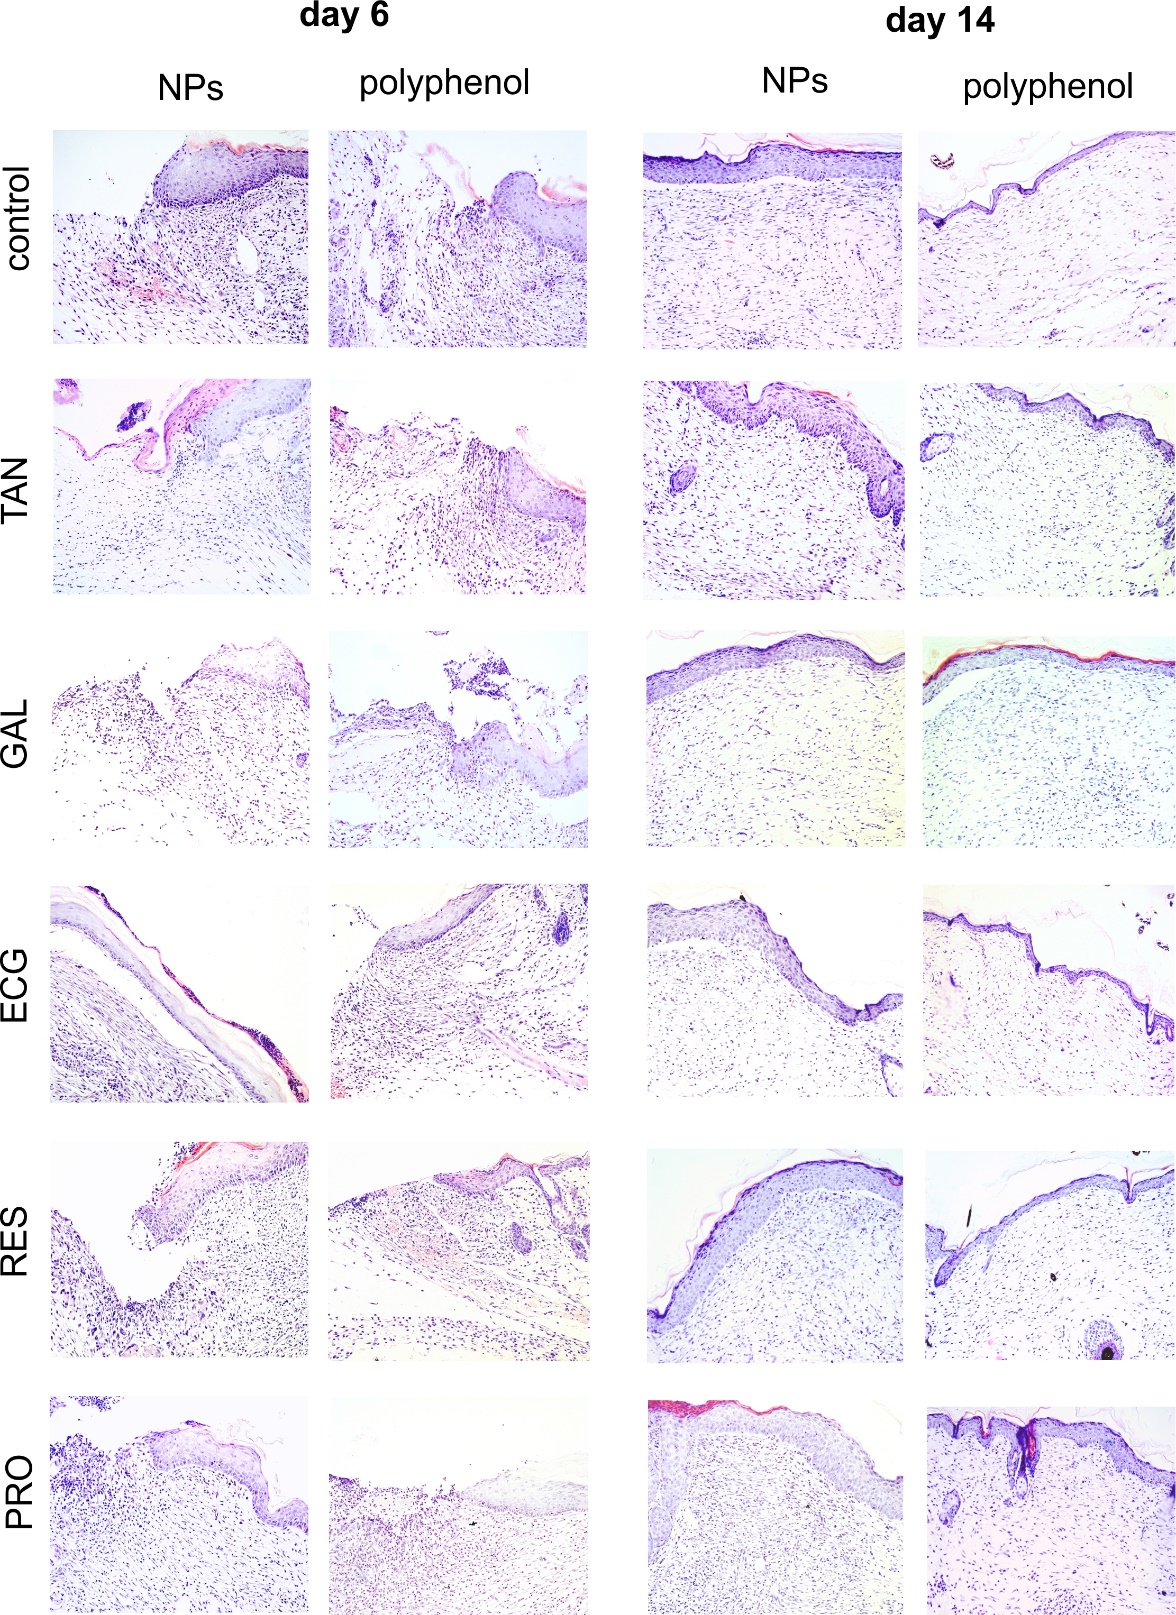

Supplement: Supplementary file 1 [file get_supplementary_file.php]
